# Supplementary material
Source: publisher figshare collection journal article supplement (https://tandf.figshare.com/ndownloader/files/15377588)
Supplement: Supplementary file 1 [file 15377588]

Figure S1: Flowchart of the identification process carried out by UWC-A investigators  
Information adapted from The Australian Army (2017).

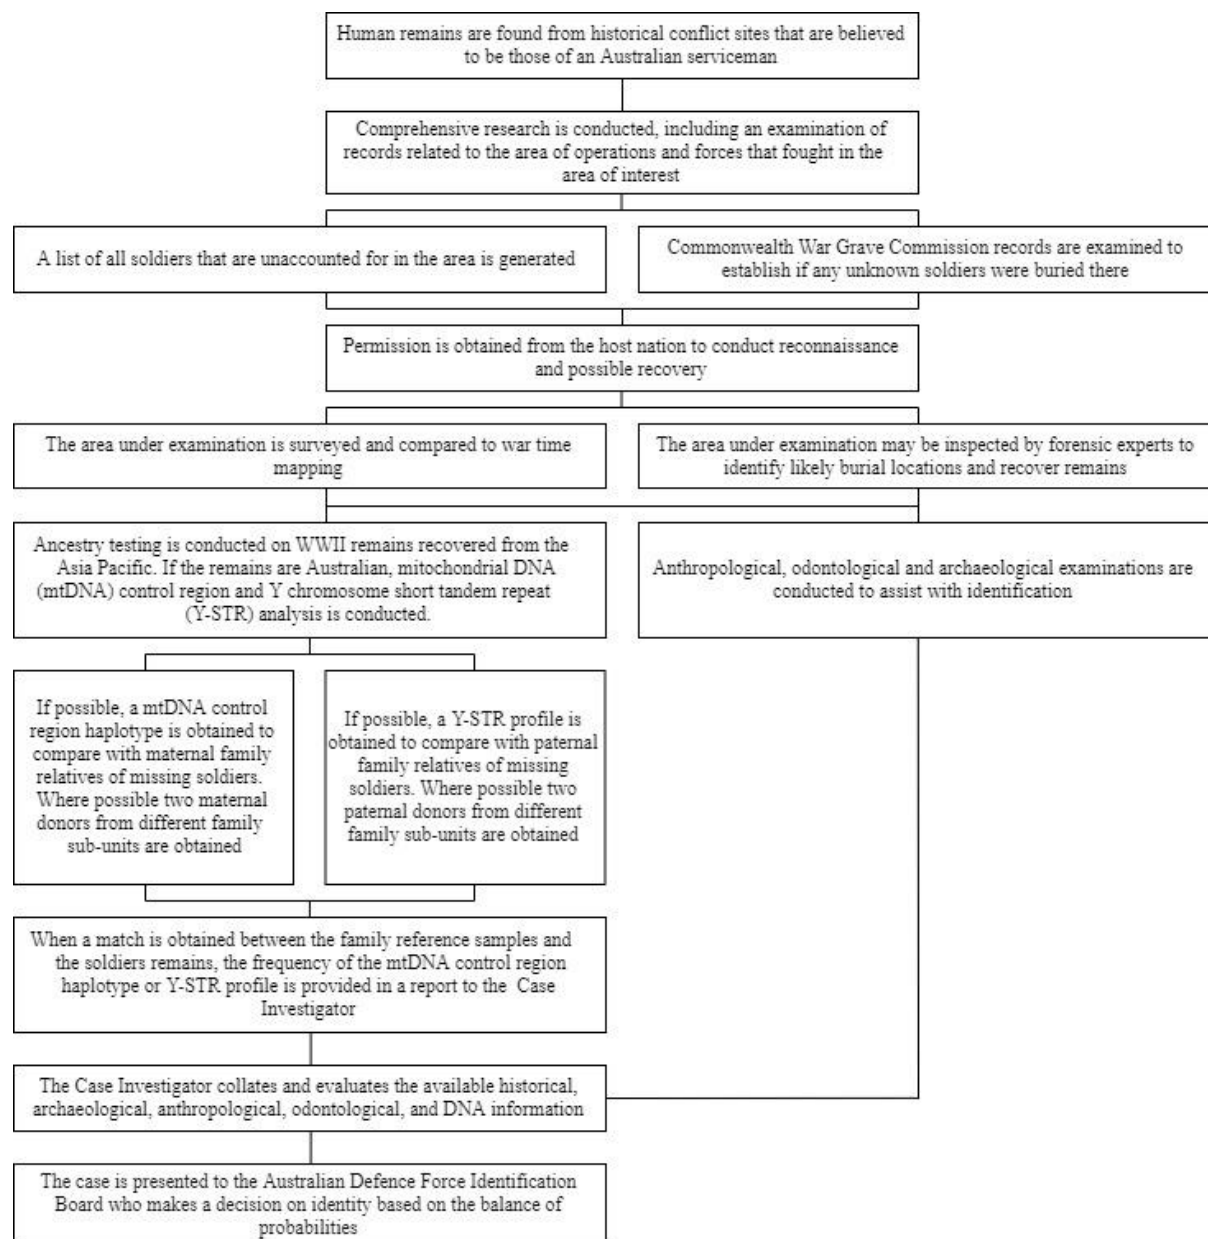

The Australian Army. 2017. "What We Do." 2017. [www.army.gov.au/our-work/unrecovered-war-casualties/what-we-do](http://www.army.gov.au/our-work/unrecovered-war-casualties/what-we-do).
